# Supplementary material for: Knowledge, Acceptance, and Use of Traditional, Complementary, and Alternative Medicine Among Peruvian Medical Students: Insights from a Multicenter Cross-Sectional Study
Source: Research Square preprint supplement (doi:10.21203/rs.3.rs-8340724/v1), 2026-02-19
Supplement: Supplementary file 1 [file 445fa20a5dd33846bc127d84.docx]

| **DOMAIN** | **TECHNIQUES/METHODS** | **PRIMARY OUTCOMES** | **VARIABLE MEASUREMENT** | **CATEGORIES FOR ANALYSIS** |
| --- | --- | --- | --- | --- |
| **Traditional Medicine (TM):**  A body of knowledge, skills, and practices based on indigenous/ancestral theories, beliefs, and experiences, used to maintain health and to prevent, diagnose, improve, or treat physical and mental illnesses.  In Peru, these practices are embedded in local worldviews—particularly Andean—and are transmitted intergenerationally, remaining prevalent in the population | Use of medicinal plants by traditional healer: Practice in which a traditional healer selects, prepares, and administers plants based on local knowledge for prevention or treatment of ailments. | **KNOWLEDGE OF T&CM**  A participant is considered to “Know TM/CAM” if they report having heard of and can identify at least one Traditional Medicine (TM) technique and at least one Complementary/Alternative Medicine (CAM) method. Lack of recognition in either category is classified as “Does not know.”  **ACCEPTANCE OF T&CM**  A participant is considered to “Accept TM/CAM” if they declare willingness to receive or allow at least one TM technique and at least one CAM method. Lack of acceptance in either category is classified as “Does not accept.”.  **USE OF T&CM**  A participant is considered to “Use TM/CAM” if they report having ever used at least one TM technique and at least one CAM method. Lack of use in either category is classified as “Does not use.”. | **Theoretical–Conceptual Knowledge:** | |
| Egg rubbing: Ritual in which an egg is rubbed over the body to “absorb” discomfort or negative energies; the egg may sometimes be interpreted after the ritual. | 1. Is there any difference between Traditional Medicine (TM) and Complementary/Alternative Medicine (CAM)? | Yes/No  Five options per question, with one correct answer** |
| Bone setting: Traditional maneuvers performed by a “bone-setter” to adjust joints or treat sprains, dislocations, and musculoskeletal pain. | 1. What do you understand by Traditional Medicine? |
| Use of mud or clay: Topical application of mud/clay in poultices or masks for anti-inflammatory, analgesic, or detoxifying purposes. | 1. What do you understand by Complementary and Alternative Medicine? |
| Spiritual cleansing by healers: Ceremonial purification involving herbs, smoke, liquids, prayers, and ritual objects to “clear” discomfort. | Have you heard of any of the techniques/methods described?* | Yes/No |
| Guinea pig massage: Diagnostic-therapeutic practice where a guinea pig is passed over the body; in some contexts, the animal is examined to “read” the cause of illness. |
| Use of urine: Therapeutic use of one’s own urine (ingestion or topical application); traditional practice with high controversy regarding safety and evidence. |
| San Pedro session: Ritual session with San Pedro cactus (Echinopsis pachanoi), with entheogenic effects, guided by a facilitator/healer for therapeutic or spiritual purposes. |
| Ayahuasca session: Ceremony using a psychoactive brew (mainly Banisteriopsis caapi and Psychotria viridis), led by a specialist for therapeutic-spiritual purposes. |
| Offering to the earth: Ritual to Pachamama requesting balance, protection, or healing; includes altars with symbolic elements and prayers. |
| **Complementary and Alternative Medicine (CAM):**  A field encompassing systems, practices, and products generally not included in conventional medicine.  Complementary: used alongside conventional medicine (e.g., acupuncture to relieve side effects).  Alternative: used in place of conventional medicine. | Phytotherapy: Use of medicinal plants and standardized preparations (extracts, infusions, capsules) for preventive or therapeutic purposes. |
| Acupuncture: Traditional Chinese medicine technique stimulating specific points (usually with fine needles) to modulate pain and physiological functions. | Would you accept any of the techniques/methods described?* | Yes/No |
| Nutritional therapy: Planned use of foods or dietary patterns for treatment and disease prevention. |
| Balneotherapy and peloid therapy: Use of mineral-medicinal waters and prepared “peloids” (mud, silt, algae) for rheumatologic, dermatologic, or rehabilitation purposes. |
| Hydrotherapy: Therapeutic use of water (baths, showers, compresses, contrasts) for analgesia, rehabilitation, and wellbeing. |
| Ozone therapy: Administration of ozone-oxygen mixtures via various routes for therapeutic purposes; efficacy and safety are debated and variably regulated. |
| Apitherapy: Use of bee products (honey, propolis, royal jelly, venom) for therapeutic purposes; includes topical applications or controlled stings. |
| Functional foods and nutraceuticals: Foods or bioactive components (e.g., fortified products, extracts) consumed for potential health benefits beyond basic nutrition. | Have you ever used any of the techniques/methods described?* | Yes/No |
| Reflexology: Manual stimulation of “reflex” points on feet/hands/ears to influence bodily functions and relieve symptoms. |
| Chiropractic: Musculoskeletal care focused on the spine and joints through adjustments/manipulations and related techniques. |
| Reiki: Japanese bioenergetic practice of “hand placement” aimed at promoting relaxation and energetic balance. |
| *These questions were asked for each technique/method included in the assessment. **The correct answers for each question were:  Question 2: A set of knowledge and practices passed down from generation to generation, which can be used for prevention, treatment, and/or rehabilitation.  Question 3: Systems of healthcare practices based on evidence that are not part of the country’s traditional practices or the conventional healthcare system. | | | | |

**Supplementary Table 1.** Operationalization matrix of Traditional and Complementary/Alternative Medicine (T&CM): catalog of techniques, questionnaire items, and definitions
