# Supplementary material for: Knowledge, Acceptance, and Use of Traditional, Complementary, and Alternative Medicine Among Peruvian Medical Students: Insights from a Multicenter Cross-Sectional Study
Source: Research Square preprint supplement (doi:10.21203/rs.3.rs-8340724/v1), 2026-02-19
Supplement: Supplementary file 2 [file fc5ba8af9fe1ebb89b80a200.docx]

**Supplementary Material 1.** Questionnaire

**KNOWLEDGE, ACCEPTANCE, AND USE OF TRADITIONAL, ALTERNATIVE, AND COMPLEMENTARY MEDICINE AMONG MEDICAL STUDENTS AT PERUVIAN UNIVERSITIES**

|  |  | |  |
| --- | --- | --- | --- |
|  |  |  |  |

Age:

Sex: 🖵 F🖵 M

University:

Type of University: 🖵 Private 🖵 Public

Academic year:

Please answer the following geographic questions using the following format: District/Province/Region

Place of origin:

Place of birth:

Mother’s place of birth:

Father’s place of birth:

Language(s) spoken: 🖵 Spanish 🖵 Quechua 🖵 Aymara 🖵 Other:

Perceived ethnicity: Native / Black, Afro-descendant, Zambo / White / Mestizo.

1. Have you taken any course related to Traditional, Alternative, and/or Complementary Medicine (T&CM)?

🖵 YES 🖵 NO

1. If yes, how did you take the course?

☐ University elective course

☐ Mandatory university course

☐ Course outside the university

1. If yes, what was the modality of the course?

☐ In-person ☐ Virtual

**Evaluation of T&CM concepts**

4. Is there any difference between Traditional Medicine and Alternative or Complementary Medicine?

☐ YES ☐ NO

5. What do you understand by Traditional Medicine?

a. It refers to the methods used by shamans

b. These are methods used only by our ancestors (pre-Inca and Inca)

c. A sum of knowledge, skills, and practices based on myths and beliefs

d. A set of knowledge and practices passed down from generation to generation, which may be used for prevention, diagnosis, treatment, and/or rehabilitation

e. The use of medicinal plants to solve health problems in people

6. What do you understand by Alternative and Complementary Medicine?

f. Methods used by the population without any scientific evidence

g. A set of knowledge passed down from generation to generation, used as a second option to conventional medicine

h. Systems of healthcare practices based on evidence that are not part of the country’s tradition nor the conventional medical system

i. Practices used to reduce medication consumption

j. Methods used by popular therapists (healers)

**Exposure to and Environment Surrounding T&CM**

7. Are you aware if T&CM is practiced in your district?

☐ YES ☐ NO

8. Has any teacher outside the T&CM course mentioned the course to you?

☐ YES ☐ NO

9. Have you discussed the use of T&CM with your family members?

🖵 YES 🖵 NO

10. Are you interested in searching for information about T&CM?

🖵 YES 🖵 NO

11. Are you aware of the acceptance of T&CM by national or international organizations or institutions or recognized scientific credibility?

🖵 YES 🖵 NO

**Perceptions of T&CM**

12. Do you have a positive perception or physicians who practice T&CM?

|  | 🖵 YES | 🖵 NO |
| --- | --- | --- |
|  | 13. In your future medical practice, would you recommend patients or advise them to Access treatments with T&CM in cases of illness? | |
|  | 🖵 YES | 🖵 NO |
| . | 14. Would you accept training related to T&CM? | |
|  | 🖵 YES | 🖵 NO |

15. Would you recognize CAM as specialty?

🖵 YES 🖵 NO

16. As a future physician, if you find out that one of your patients has used T&CM, would you consider encouraging them to using it?

🖵 YES 🖵 NO

17. Do you consider it appropriate to integrate the approach of traditional and alternative medicine into modern medical practice?

🖵 YES 🖵 NO

18. Please mark with an “X” for affirmative responses and leave the space blank for negative responses.

| **No.** | **Method** | **Do you know it?** | **Would you accept it or have you used it?** | **Was this your first time?** | **Experience with the method was: Positive (P) / Negative (N)** |
| --- | --- | --- | --- | --- | --- |
| 1 | Use of medicinal plants by a healer | ☐ | ☐ | ☐ | ☐ P ☐ N |
| 2 | Egg cleansing ritual (*“egg passing”*) | ☐ | ☐ | ☐ | ☐ P ☐ N |
| 3 | Bone-setting therapy (method used by a bonesetter) | ☐ | ☐ | ☐ | ☐ P ☐ N |
| 4 | Use of mud or clay | ☐ | ☐ | ☐ | ☐ P ☐ N |
| 5 | Spiritual cleansing performed by healers | ☐ | ☐ | ☐ | ☐ P ☐ N |
| 6 | Guinea pig rubbing ritual | ☐ | ☐ | ☐ | ☐ P ☐ N |
| 7 | Use of urine | ☐ | ☐ | ☐ | ☐ P ☐ N |
| 8 | San Pedro ritual ceremony | ☐ | ☐ | ☐ | ☐ P ☐ N |
| 9 | Ayahuasca session | ☐ | ☐ | ☐ | ☐ P ☐ N |
| 10 | Offering ritual to Mother Earth (*“Pago a la Tierra”*) | ☐ | ☐ | ☐ | ☐ P ☐ N |
| 11 | Phytotherapy (use of medicinal plants) | ☐ | ☐ | ☐ | ☐ P ☐ N |
| 12 | Acupuncture | ☐ | ☐ | ☐ | ☐ P ☐ N |
| 13 | Trophotherapy (use of food as treatment) | ☐ | ☐ | ☐ | ☐ P ☐ N |
| 14 | Thermal therapy and peloidotherapy (use of medicinal mud, algae) | ☐ | ☐ | ☐ | ☐ P ☐ N |
| 15 | Hydrotherapy | ☐ | ☐ | ☐ | ☐ P ☐ N |
| 16 | Ozone therapy | ☐ | ☐ | ☐ | ☐ P ☐ N |
| 17 | Apitherapy (bee sting therapy) | ☐ | ☐ | ☐ | ☐ P ☐ N |
| 18 | Functional foods and nutraceuticals (Omnilife, Prolife, Herbalife, etc.) | ☐ | ☐ | ☐ | ☐ P ☐ N |
| 19 | Reflexology | ☐ | ☐ | ☐ | ☐ P ☐ N |
| 20 | Chiropractic | ☐ | ☐ | ☐ | ☐ P ☐ N |
| 21 | Reiki | ☐ | ☐ | ☐ | ☐ P ☐ N |
| 22 | Homeopathy | ☐ | ☐ | ☐ | ☐ P ☐ N |
| 23 | Floral therapy (including Bach flower remedies) | ☐ | ☐ | ☐ | ☐ P ☐ N |
| 24 | Aromatherapy | ☐ | ☐ | ☐ | ☐ P ☐ N |
| 25 | Music therapy | ☐ | ☐ | ☐ | ☐ P ☐ N |
| 26 | Neural therapy | ☐ | ☐ | ☐ | ☐ P ☐ N |
| 27 | Yoga | ☐ | ☐ | ☐ | ☐ P ☐ N |
| 28 | Tai Chi | ☐ | ☐ | ☐ | ☐ P ☐ N |
| 29 | Bioenergetic therapy | ☐ | ☐ | ☐ | ☐ P ☐ N |
| 30 | Biodanza | ☐ | ☐ | ☐ | ☐ P ☐ N |
| 31 | Ayurvedic medicine | ☐ | ☐ | ☐ | ☐ P ☐ N |
| 32 | Hyperbaric chamber therapy | ☐ | ☐ | ☐ | ☐ P ☐ N |
| 33 | Mind–body medicine (biodecoding, hypnosis, family constellations, NLP, etc.) | ☐ | ☐ | ☐ | ☐ P ☐ N |
